# Supplementary material
Source: publisher figshare collection journal article supplement (https://frontiersin.figshare.com/ndownloader/files/20088455)
Supplement: Supplementary file [file 20088455]

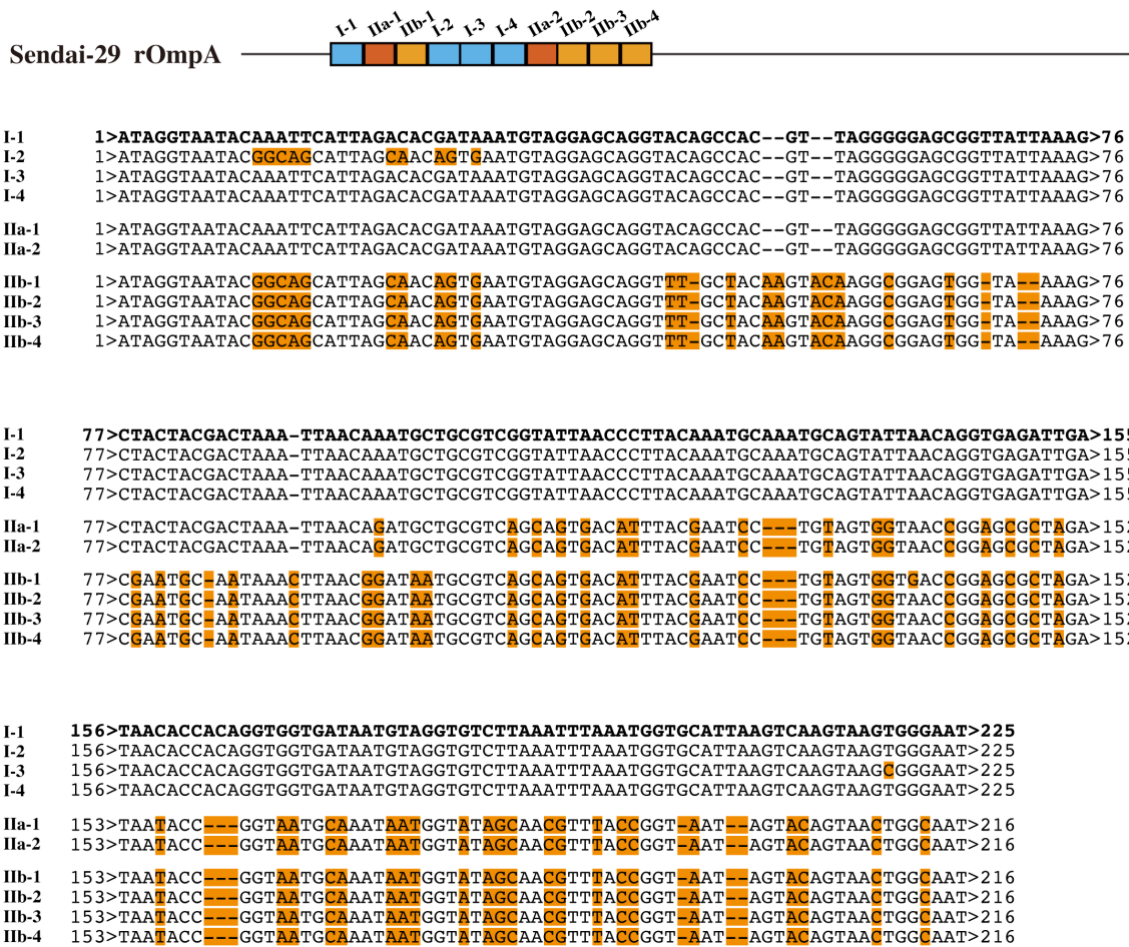

**Supplementary Figure 1. Sequence alignment of the repeat units in the *rompA* gene of *R. heilongjiangensis* strain Sendai-29.**

The units are classified into type I, type II-a, and type II-b. Nucleotides that differ from those in type I-1 are highlighted in orange.
